# Supplementary material
Source: PubMed Central journal article supplement (PMC9726988)
Supplement: NIHMS1817274-supplement-1.pdf [file NIHMS1817274-supplement-1.pdf]

**SUPPLEMENTAL TABLE 1: Unweighted sample sizes and weighted response rates<sup>a</sup> for the PATH Study W1 Cohort by data collection wave**

| Wave                                                    | Youth Interview   |                      |                              | Adult Interview    |                      |                              |
|---------------------------------------------------------|-------------------|----------------------|------------------------------|--------------------|----------------------|------------------------------|
|                                                         | Aged-up youth (N) | Total n <sup>a</sup> | Response Rate <sup>b,c</sup> | Aged-up adults (N) | Total n <sup>a</sup> | Response Rate <sup>b,c</sup> |
| <b>Wave 1<sup>d</sup></b><br><b>(09/12/13–12/14/14)</b> | ---               | 13,651               | 78.4%                        | ---                | 32,320               | 74.0%                        |
| <b>Wave 2</b><br><b>(10/23/14–10/30/15)</b>             | 2,091             | 12,172               | 87.3%                        | 1,915              | 28,362               | 83.2%                        |
| <b>Wave 3</b><br><b>(10/19/15–10/23/16)</b>             | 2,045             | 11,814               | 83.3%                        | 1,907              | 28,148               | 78.4%                        |
| <b>Wave 4</b><br><b>(12/01/16-01/03/18)</b>             | 1,694             | 11,059               | 79.5%                        | 1,900              | 27,757               | 73.5%                        |

<sup>a</sup>Total n includes aged-up youth (shadow youth who turned 12 and were eligible for the youth interview) and aged-up adults (youth who turned 18 and were eligible for the adult interview). (The age range for eligible youth was 12 to 17 years; the age range for eligible adults was 18 years and older. Note this table reports response rates for all adults, while the focus population of this manuscript is young adults 18 to 24 years old.

<sup>b</sup>W1 weighted response rates are among households with completed screeners; W2-W4 response rates are conditional on participation at W1.

<sup>c</sup>Weighted attrition rates for W2-W4 correspond to 100 minus the weighted response rate for each interview type (i.e., youth, adult).

<sup>d</sup>At W1, the weighted response rate for the household screener was 54.0%. Among households screened, the overall W1 weighted response rate was 74.0% for the adult interview and 78.4% for the youth interview. Future wave weighted response rates are conditional upon W1 participation.

SUPPLEMENTAL TABLE 2: Initiation by PATH Study W4 among W1 Never Users for Different Tobacco Products

|                                                                                                                                                                                                                                                                                                                                                                                                                                                                                                                                                         |                                                   | Tobacco product       | Number of users<br>(numerator) | Weighted<br>Estimated<br>number of users | Estimated<br>percent<br>(weighted) | 95% CI |      |
|---------------------------------------------------------------------------------------------------------------------------------------------------------------------------------------------------------------------------------------------------------------------------------------------------------------------------------------------------------------------------------------------------------------------------------------------------------------------------------------------------------------------------------------------------------|---------------------------------------------------|-----------------------|--------------------------------|------------------------------------------|------------------------------------|--------|------|
| <b>Youth</b>                                                                                                                                                                                                                                                                                                                                                                                                                                                                                                                                            | Initiation at any point<br>between W2-W4 since W1 | Any tobacco           | 2,385                          | 5,955,000                                | 32.5                               | 31.2   | 33.7 |
|                                                                                                                                                                                                                                                                                                                                                                                                                                                                                                                                                         |                                                   | Cigarette             | 1,326                          | 3,368,000                                | 15.8                               | 15.0   | 16.6 |
|                                                                                                                                                                                                                                                                                                                                                                                                                                                                                                                                                         |                                                   | ENDS                  | 2,278                          | 5,835,000                                | 26.7                               | 25.5   | 27.9 |
|                                                                                                                                                                                                                                                                                                                                                                                                                                                                                                                                                         |                                                   | Any cigar             | 1,223                          | 3,169,000                                | 14.4                               | 13.6   | 15.2 |
|                                                                                                                                                                                                                                                                                                                                                                                                                                                                                                                                                         |                                                   | Pipe                  | 244                            | 617,000                                  | 2.6                                | 2.3    | 2.9  |
|                                                                                                                                                                                                                                                                                                                                                                                                                                                                                                                                                         |                                                   | Hookah                | 1,035                          | 2,689,000                                | 11.8                               | 11.1   | 12.5 |
|                                                                                                                                                                                                                                                                                                                                                                                                                                                                                                                                                         |                                                   | Any smokeless tobacco | 510                            | 1,363,000                                | 6.0                                | 5.4    | 6.6  |
| <sup>1</sup> A number of W1 youth never users of a product were missing item-level data for tobacco use status at W2-W4 (n=179 any tobacco, n=14 cigarette, n=48<br>ENDS, n=67 any cigar, n=44 pipe tobacco, n=26 hookah, n=181 any smokeless tobacco, n=42 dissolvable tobacco). A number of W1 young adult never users<br>of a product were missing item-level data for tobacco use status at W2-W4 (n=7 any tobacco, n<5 cigarette, n=37 ENDS, n=0 any cigar, n<5 pipe tobacco, n<5<br>hookah, n=12 any smokeless tobacco, n=14 dissolvable tobacco) |                                                   |                       |                                |                                          |                                    |        |      |
| <b>Young<br/>adults</b>                                                                                                                                                                                                                                                                                                                                                                                                                                                                                                                                 | Initiation at any point<br>between W2-W4 since W1 | Any tobacco           | 319                            | 2,521,000                                | 25.9                               | 22.7   | 29.3 |
|                                                                                                                                                                                                                                                                                                                                                                                                                                                                                                                                                         |                                                   | Cigarette             | 329                            | 1,917,000                                | 13.5                               | 11.9   | 15.3 |
|                                                                                                                                                                                                                                                                                                                                                                                                                                                                                                                                                         |                                                   | ENDS                  | 979                            | 5,030,000                                | 25.0                               | 23.1   | 26.9 |
|                                                                                                                                                                                                                                                                                                                                                                                                                                                                                                                                                         |                                                   | Any cigar             | 475                            | 2,417,000                                | 15.0                               | 13.5   | 16.8 |
| <sup>2</sup> This table rounds weighted numbers down to the nearest thousandth.                                                                                                                                                                                                                                                                                                                                                                                                                                                                         |                                                   | Pipe                  | 208                            | 892,000                                  | 3.4                                | 2.9    | 4.0  |
|                                                                                                                                                                                                                                                                                                                                                                                                                                                                                                                                                         |                                                   | Hookah                | 488                            | 2,684,000                                | 16.0                               | 14.2   | 18.0 |
| <sup>3</sup> This table includes youth (12-17 years) and young adults (18-24 years) who had never used the specific product in question but may have used other<br>products in the past.                                                                                                                                                                                                                                                                                                                                                                |                                                   | Any smokeless tobacco | 175                            | 837,000                                  | 3.3                                | 2.8    | 4.0  |
|                                                                                                                                                                                                                                                                                                                                                                                                                                                                                                                                                         |                                                   | Dissolvable           | 48                             | 210,000                                  | 0.7                                | 0.5    | 1.0  |
| <sup>4</sup> Any cigar use = respondents who had ever used any of the three types of cigars (traditional cigars, cigarillos, and filtered cigars)                                                                                                                                                                                                                                                                                                                                                                                                       |                                                   |                       |                                |                                          |                                    |        |      |
| <sup>5</sup> Any smokeless tobacco use = respondents who had ever used either snus pouches or other smokeless tobacco, not including dissolvable tobacco (which<br>was asked as a separate category)                                                                                                                                                                                                                                                                                                                                                    |                                                   |                       |                                |                                          |                                    |        |      |

**SUPPLEMENTAL TABLE 3: Initiation by W4 stratified by never-ever any tobacco use status at W1 in the PATH Study**

|                     |                                                              | Tobacco product       | W1 Ever Use Any Tobacco     |                           |                   |             | W1 Never Use Any Tobacco    |                           |                   |             |
|---------------------|--------------------------------------------------------------|-----------------------|-----------------------------|---------------------------|-------------------|-------------|-----------------------------|---------------------------|-------------------|-------------|
|                     |                                                              |                       | Number of users (numerator) | Estimated number of users | Estimated percent | 95% CI      | Number of users (numerator) | Estimated number of users | Estimated percent | 95% CI      |
| <b>Youth</b>        | Past 12-month initiation at any point between W2-W4 since W1 | Any tobacco           | NA                          |                           |                   |             | 2,385                       | 5,955,000                 | 32.5              | (31.2-33.7) |
|                     |                                                              | Cigarette             | 277                         | 744,000                   | 40.5              | (36.7-44.5) | 1,009                       | 2,532,000                 | 13.5              | (12.8-14.3) |
|                     |                                                              | ENDS                  | 548                         | 1,467,000                 | 59.1              | (54.8-63.3) | 1,674                       | 4,220,000                 | 22.6              | (21.5-23.8) |
|                     |                                                              | Any cigar             | 425                         | 1,135,000                 | 35.7              | (32.5-39.0) | 784                         | 1,994,000                 | 10.7              | (10.0-11.5) |
|                     |                                                              | Pipe                  | 140                         | 359,000                   | 7.8               | (6.6-9.2)   | 99                          | 243,000                   | 1.3               | (1.0-1.6)   |
|                     |                                                              | Hookah                | 370                         | 986,000                   | 29.6              | (26.9-32.4) | 644                         | 1,647,000                 | 8.8               | (8.1-9.5)   |
|                     |                                                              | Any smokeless tobacco | 202                         | 575,000                   | 15.0              | (12.9-17.3) | 299                         | 765,000                   | 4.2               | (3.7-4.6)   |
|                     |                                                              | Dissolvable           | 25                          | 61,000                    | 1.2               | (0.7-2.0)   | 16                          | 38,000                    | 0.2               | (0.1-0.3)   |
| <b>Young adults</b> | Past 12-month initiation at any point between W2-W4 since W1 | Any tobacco           | NA                          |                           |                   |             | 319                         | 2,521,000                 | 25.9              | (22.7-29.3) |
|                     |                                                              | Cigarette             | 194                         | 893,000                   | 21.1              | (17.7-24.8) | 131                         | 987,000                   | 10.1              | (8.5-11.9)  |
|                     |                                                              | ENDS                  | 834                         | 3,852,000                 | 37.4              | (35.0-39.8) | 143                         | 1,154,000                 | 11.9              | (9.8-14.4)  |
|                     |                                                              | Any cigar             | 350                         | 1,479,000                 | 23.7              | (21.1-26.6) | 124                         | 932,000                   | 9.5               | (7.8-11.5)  |
|                     |                                                              | Pipe                  | 198                         | 809,000                   | 5.0               | (4.3-5.8)   | 10                          | 83,000                    | 0.9*              | (0.4-1.6)   |
|                     |                                                              | Hookah                | 338                         | 1,525,000                 | 22.5              | (19.8-25.3) | 147                         | 1,128,000                 | 11.5              | (9.4-14.0)  |
|                     |                                                              | Any smokeless tobacco | 157                         | 673,000                   | 4.5               | (3.8-5.3)   | 18                          | 163,000                   | 1.7               | (1.0-2.7)   |

|  |  |             |    |         |     |           |   |        |      |           |
|--|--|-------------|----|---------|-----|-----------|---|--------|------|-----------|
|  |  | Dissolvable | 45 | 182,000 | 0.9 | (0.7-1.3) | 3 | 27,000 | 0.3* | (0.1-0.9) |
|--|--|-------------|----|---------|-----|-----------|---|--------|------|-----------|

\*Relative standard error is greater than 30%.

<sup>1</sup>This table rounds weighted numbers down to the nearest thousandth.

<sup>2</sup>Any cigar use = respondents who had ever used any of the three types of cigars (traditional cigars, cigarillos, and filtered cigars).

<sup>3</sup>Any smokeless tobacco use = respondents who had ever used either snus pouches or other smokeless tobacco, not including dissolvable tobacco (which was asked as a separate category).

<sup>4</sup>The age range for eligible youth was 12 to 17 years; the age range for eligible adults was 18 to 24 years.

Journal Pre-proofs

Supplemental Table 4: Past 12-month Initiation by W4 among W3 Never Tobacco Users, by product

|                     | Tobacco product | Number of users (numerator) | Weighted Estimated number of users | Estimated percent (weighted) | 95% CI |     |
|---------------------|-----------------|-----------------------------|------------------------------------|------------------------------|--------|-----|
| <b>Youth</b>        | Cigarette       | 415                         | 959,000                            | 4.3                          | 3.9    | 4.8 |
|                     | ENDS            | 542                         | 1,357,000                          | 6.6                          | 6.0    | 7.3 |
|                     | Any cigar       | 337                         | 822,000                            | 3.6                          | 3.2    | 4.0 |
|                     | Pipe tobacco    | 56                          | 135,000                            | 0.6                          | 0.4    | 0.7 |
|                     | Hookah          | 159                         | 387,000                            | 1.7                          | 1.4    | 2.0 |
|                     | Any smokeless   | 136                         | 329,000                            | 1.4                          | 1.2    | 1.7 |
|                     | Dissolvable     | 13                          | 25,000                             | 0.1                          | 0.06   | 0.2 |
| <b>Young adults</b> | Cigarette       | 226                         | 842,000                            | 5.8                          | 5.0    | 6.7 |
|                     | ENDS            | 208                         | 561,000                            | 4.5                          | 4.3    | 4.9 |
|                     | Any cigar       | 247                         | 781,000                            | 5.0                          | 4.3    | 5.8 |
|                     | Pipe tobacco    | 75                          | 264,000                            | 1.0                          | 0.8    | 1.4 |
|                     | Hookah          | 170                         | 625,000                            | 3.9                          | 3.2    | 4.8 |
|                     | Any smokeless   | 103                         | 388,000                            | 1.6                          | 1.2    | 2.1 |
|                     | Dissolvable     | 15                          | 55,000                             | 0.2                          | 0.1    | 0.3 |

<sup>1</sup>A number of W3 youth never users of a product were missing item-level data for tobacco use status at W4 (n=9 cigarette, n=14 ENDS, n=30 any cigar, n=16 pipe tobacco, n=11 hookah, n=34 any smokeless tobacco, n=15 for dissolvable tobacco). A number of W3 young adult never users of a product were missing item-level data for tobacco use status at W4 (n=5 cigarette, n=5 ENDS, n=5 any cigar, n<5 pipe tobacco, n<5 hookah, n=6 any smokeless tobacco, n=8 for dissolvable tobacco)

<sup>2</sup>This table rounds weighted numbers down to the nearest thousandth.

<sup>3</sup> Any cigar use = respondents who had ever used any of the three types of cigars (traditional cigars, cigarillos, and filtered cigars)

<sup>4</sup> Any smokeless tobacco use = respondents who had ever used either snus pouches or other smokeless tobacco, not including dissolvable tobacco (which was asked as a separate category)

<sup>5</sup> 95% CIs for new past 12-month use are represented in the table.

<sup>6</sup> This table includes youth and young adults who had never used the specific product in question but may have used other products in the past.

Like the full sample, these respondents who participated through W1-W4, provided information about tobacco use at W3, had follow-up data for tobacco use at W4, and

---

whose age at W4 was no more than 2 years older than that at W3 (n=10,616 youth, n=7,141 young adults). The number of youth participants in W3-W4 is slightly higher than the total number of participants in W1-W4 due to youth under the age of 12 (shadow youth) becoming eligible to answer questions at age 12 and 13 in W3.

Journal Pre-proofs
